# Supplementary material for: Multilamellar ceramide core-structured microvehicles with substantial skin barrier function recovery
Source: Royal Society of Chemistry journal article supplement (doi:10.1039/d2tb02734h), 2023-01-01
Supplement: d2tb02734h1.pdf [file d2tb02734h1.pdf]

Electronic Supporting Information

## Multilamellar ceramide core-structured microvehicles with substantial skin barrier function recovery

Kyounghee Shin<sup>a</sup>, Kun Bong Lee<sup>b</sup>, Jee-Hyun Hwang<sup>c</sup>, Boryeong Lee<sup>a</sup>, Hyunsun Ryu<sup>a</sup>, Minjoo Noh<sup>d</sup>, Jun Bae Lee<sup>d</sup>, Yoon Sung Nam<sup>e,\*</sup>, Kyung-Min Lim<sup>c,\*</sup>, and Jin Woong Kim<sup>a,\*</sup>

<sup>a</sup> School of Chemical Engineering, Sungkyunkwan University, Suwon 16149, Republic of Korea.

<sup>b</sup> Interdisciplinary Program in Biocosmetics, Sungkyunkwan University, Suwon16419, Republic of Korea.

<sup>c</sup> College of Pharmacy, Ewha Womans University, Seoul 03760, Republic of Korea.

<sup>d</sup> Innovation Lab., Cosmax R&I Center, Seongnam 13486, Republic of Korea.

<sup>e</sup> Department of Materials Science and Engineering, Korea Advanced Institute of Science and Technology, Daejeon 34141, Republic of Korea.

\*Corresponding Author

Prof. Yoon Sung Nam; Tel: +82 42350 3311; E-mail: yoonsung@kaist.ac.kr

Prof. Kyung-Min Lim; Tel: +82 2 3277 3055; E-mail: kmlim@ewha.ac.kr

Prof. Jin Woong Kim; Tel: +82 31 290 7346; E-mail: jinwoongkim@skku.edu

**Keywords:** Ceramide particles, Cellulose nanofiber, Multilamellar structure, Skin barrier function

## Supporting experiments

### Cell viability test

Cell viability was measured using an EZ-Cytox kit (EZ-3000, Dogen, Korea). Human HaCaT cells were dispersed in 100  $\mu\text{L}$  of DMEM (4 mM of L-glutamine, 4500 mg  $\text{mL}^{-1}$  of glucose, 90% sodium pyruvate, 10% heat inactivated fetal bovine serum, and 1% penicillin–streptomycin) in a 96-well plate. HaCaT cells were then incubated overnight at 37  $^{\circ}\text{C}$  under 5%  $\text{CO}_2$  atmosphere in an incubator. After removal of cell media, BCNF<sub>C18</sub> and Cer dispersions were added to each well with varying their concentration. Then, 100  $\mu\text{L}$  of EZ-cytox and DMEM mixture were added to the wells. The plates were incubated for an additional 24 h and UV absorbance was measured at 450 nm using a microplate reader (Spark, Tecan, Switzerland).

### Supporting data

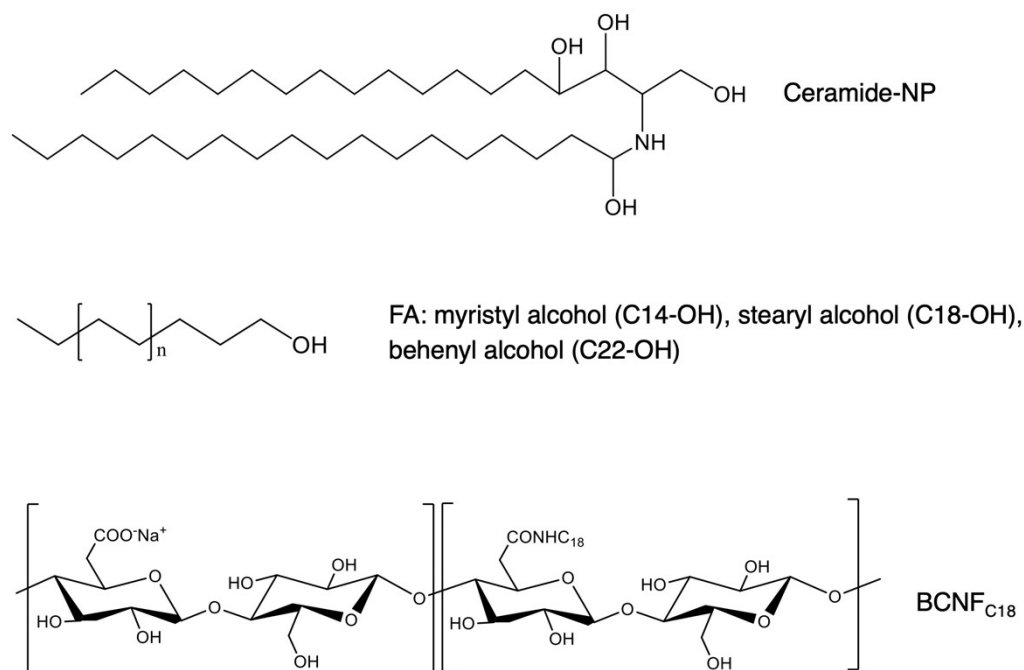

**Fig. S1** Molecular structure of ceramide, fatty alcohols, and BCNF<sub>C18</sub> employed for the fabrication of CerMPs.

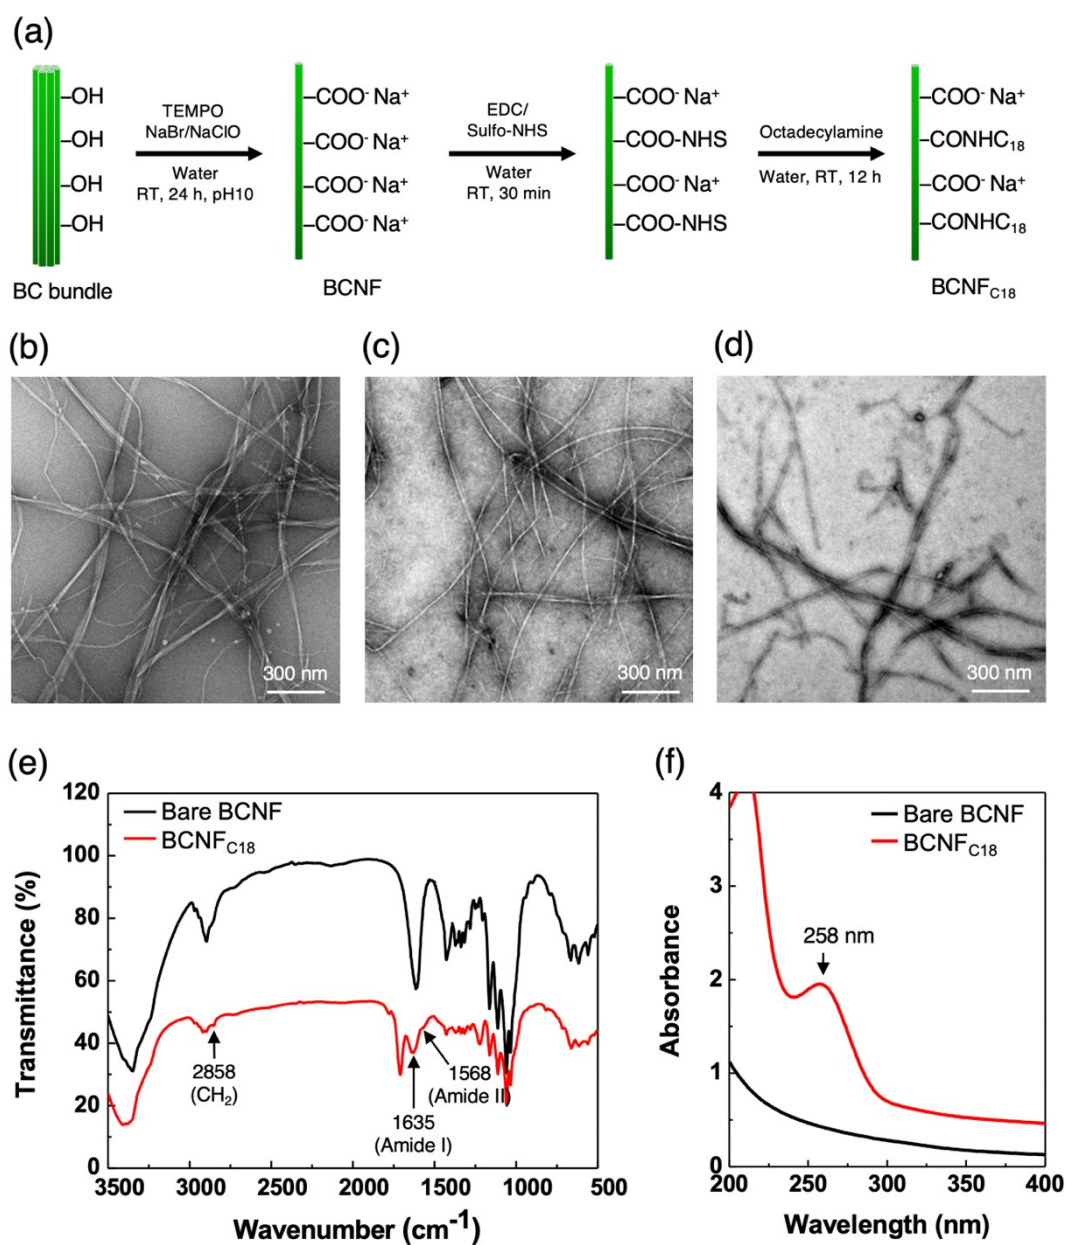

**Fig. S2** (a) Synthesis of BCNF<sub>C18</sub> from a bacterial cellulose bundle. TEM images of bacterial celluloses (b) before and (c) after TEMPO oxidation, and (d) after grafting of C18 alkyl chains. (e) FT-IR spectra and (f) UV spectra of BCNFs before and after grafting of C18 alkyl chains.

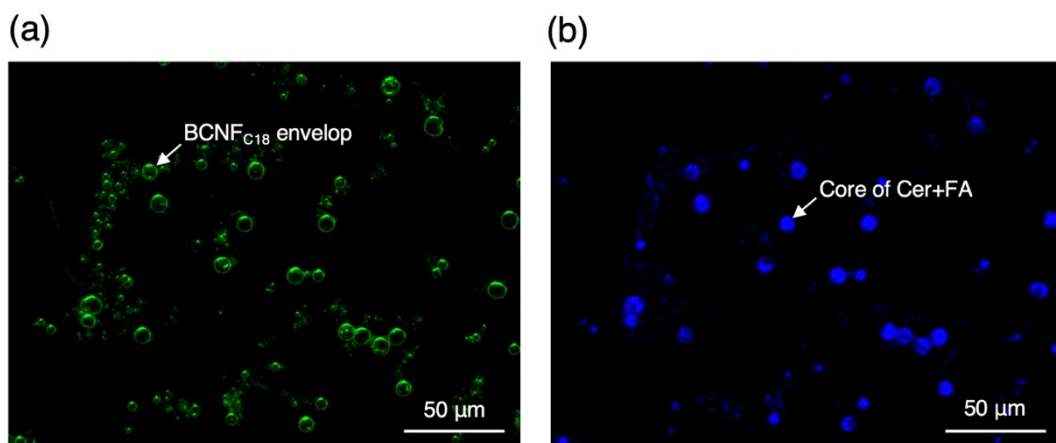

**Fig. S3** Fluorescence images of CerMPs labelled with (a) rhodamine B for BCNF<sub>C18</sub> membrane (green) and (b) 9-vinylanthracene for particle core (blue).  $\phi_{\text{Cer}} = 0.4$ , [Ceramide NP+SA] = 20 wt%, and [BCNF<sub>C18</sub>] = 0.5 wt%.

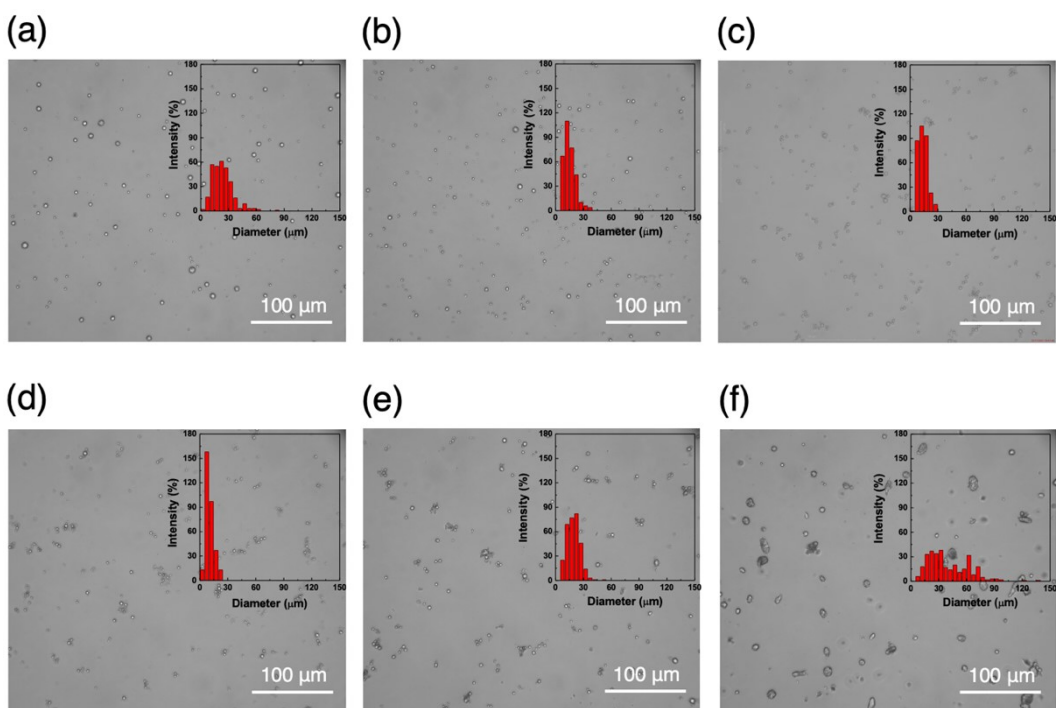

**Fig. S4** Bright-field microscope images and particle size distribution of CerMPs with varying the incorporation amount of C18 alkyl chain against total mass of Ceramide NP and FA: (a) 0.08 mmol g<sup>-1</sup>, (b) 0.16 mmol g<sup>-1</sup>, (c) 0.48 mmol g<sup>-1</sup>, (d) 0.64 mmol g<sup>-1</sup>, (e) 0.96 mmol g<sup>-1</sup>, and (f) 1.28 mmol g<sup>-1</sup> octadecylamine.  $\phi_{\text{Cer}} = 0.4$ , [Ceramide NP+SA] = 20 wt%, and [BCNF<sub>C18</sub>] = 0.5 wt%.

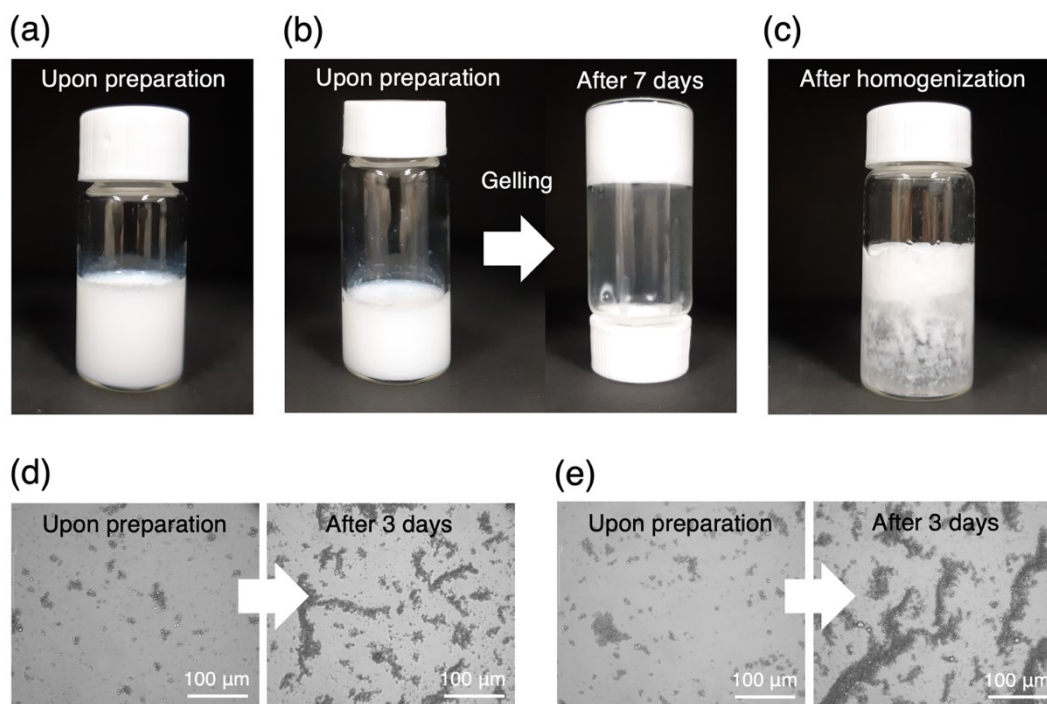

**Fig. S5** Appearances CerMP dispersions prepared with conventional molecular surfactants: (a) Pluronic F127, (b) Tween 80, and (c) SLS.  $\phi_{\text{Cer}} = 0.2$ , [Ceramide NP+SA]=20 wt%, and [Surfactant] = 5 wt%. Destabilization behavior of CerMPs prepared with Pluronic F127 with the storage time at 4 °C: (d) [Pluronic F127] = 3 wt% and (e) [Pluronic F127] = 5 wt%.  $\phi_{\text{Cer}} = 0.2$  and [Ceramide NP+SA] = 20 wt%.

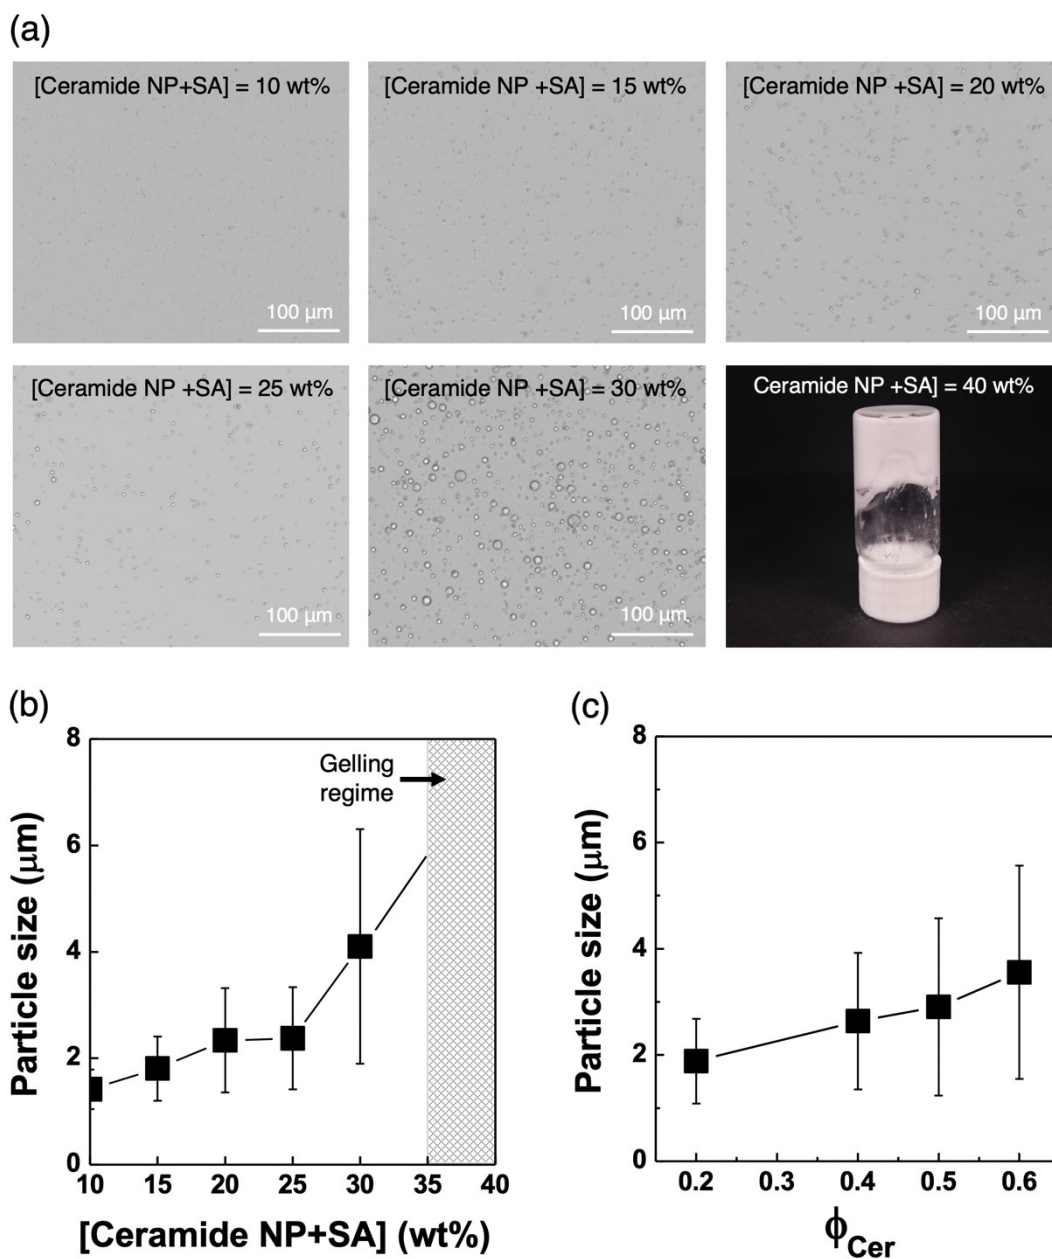

**Fig. S6** (a) Bright-field microscope images of CerMPs with varying the solid (Ceramide NP + SA) concentration. A gel-like dispersion phase was obtained from around 35 wt%. Average particle size change of CerMPs with varying (b) the core content at  $\phi_{\text{Cer}} = 0.4$  and (c) the  $\phi_{\text{Cer}}$  at [Ceramide NP+SA] = 20 wt%. [BCNF<sub>C18</sub>] = 0.5 wt%.

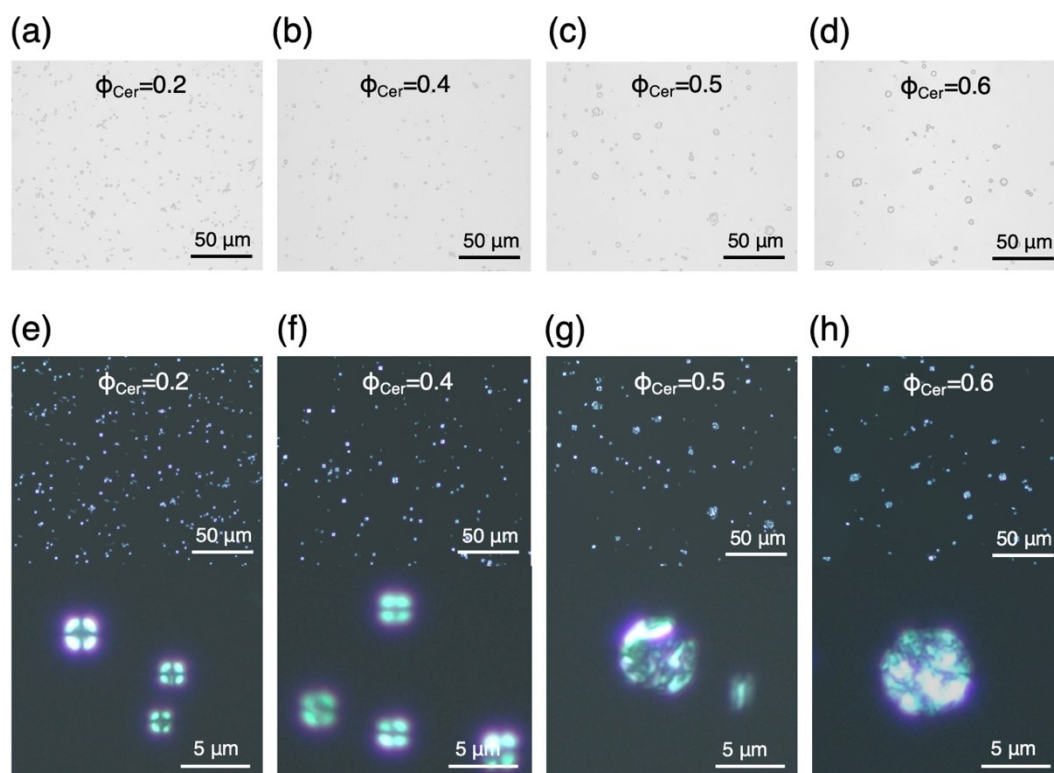

**Fig. S7** Bright-field microscope (a-d) and polarized microscope images (e-h) of CerMPs prepared with varying  $\phi_{\text{Cer}}$  after 6-month storage at 4 °C. [Ceramide NP+BA] = 20 wt% and [BCNF<sub>C18</sub>] = 0.5 wt%.

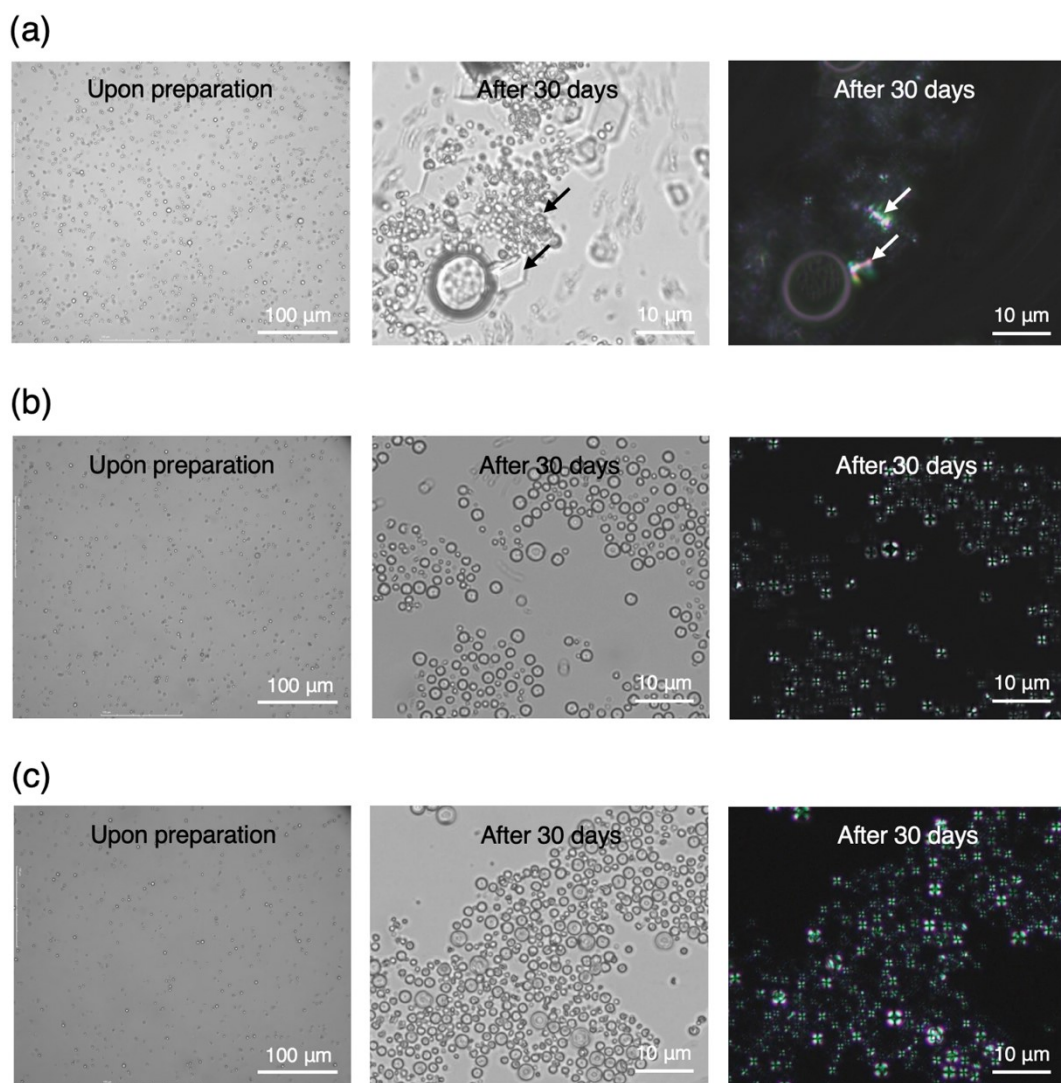

**Fig. S8** Bright-field microscope images and polarized microscope images of CerMPs upon preparation and after 30-day storage at 4 °C: (a) CerMP<sub>MA</sub>, (b) CerMP<sub>SA</sub>, and (c) CerMP<sub>BA</sub>. Arrows indicate ceramide crystals grown out of CerMP<sub>MA</sub> in the aqueous phase.  $\phi_{\text{Cer}} = 0.4$ , [Ceramide NP+FA] = 20 wt%, and [BCNF<sub>C18</sub>] = 0.5 wt%.

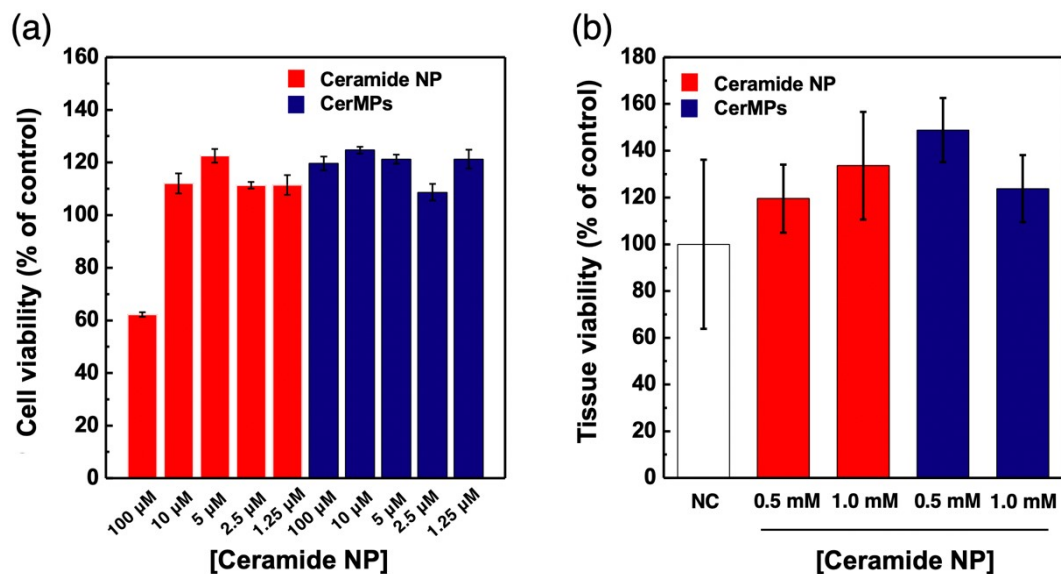

**Fig. S9** (a) Cell viability after treating HaCaT cells with Ceramide NP dispersions (red) and CerMP dispersions (blue) for 24 h incubation. (b) Tissue viability determined by WST-1 assay after 4 h treatment with Ceramide NP dispersions (red) and CerMP dispersions (blue) at given concentrations. Data were expressed as a normalized percentage of non-treated control cells (NC) after three independent experiments. Error bars represent standard deviation of the mean ( $n = 6$ ) ( $p < 0.05$ , one-way ANOVA).

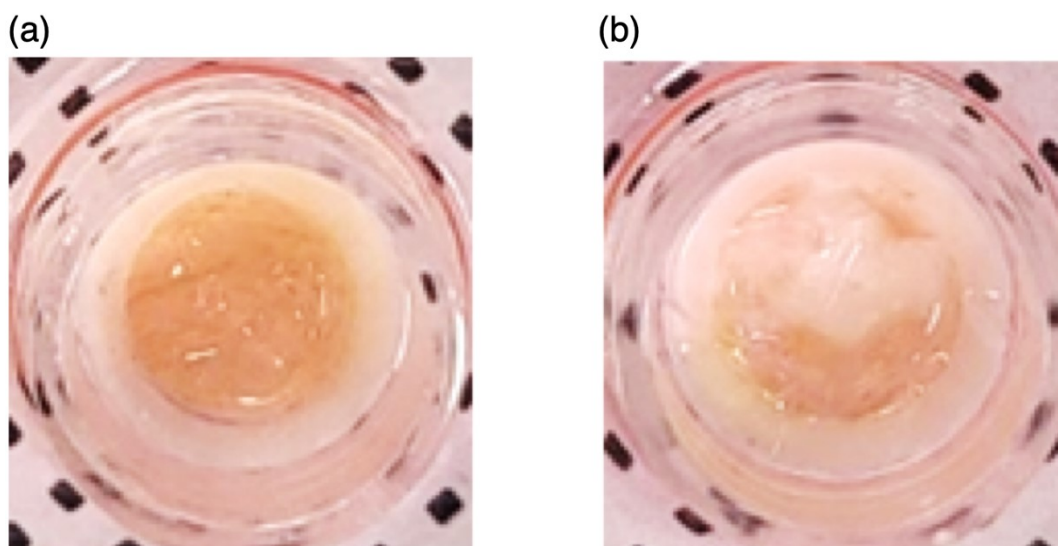

**Fig. S10** (a) Normal porcine tissue. (b)  $H_2O_2$ -induced damaged porcine tissue.
